# Supplementary material
Source: PubMed Central journal article supplement (PMC5540776)

Gu, Supplementary Figure S3. Validation of *Villin-Cre;Vhl;Bap1/Pbrm1* and *Sgt2-Cre;Vhl;Bap1/Pbrm1* mice.

A

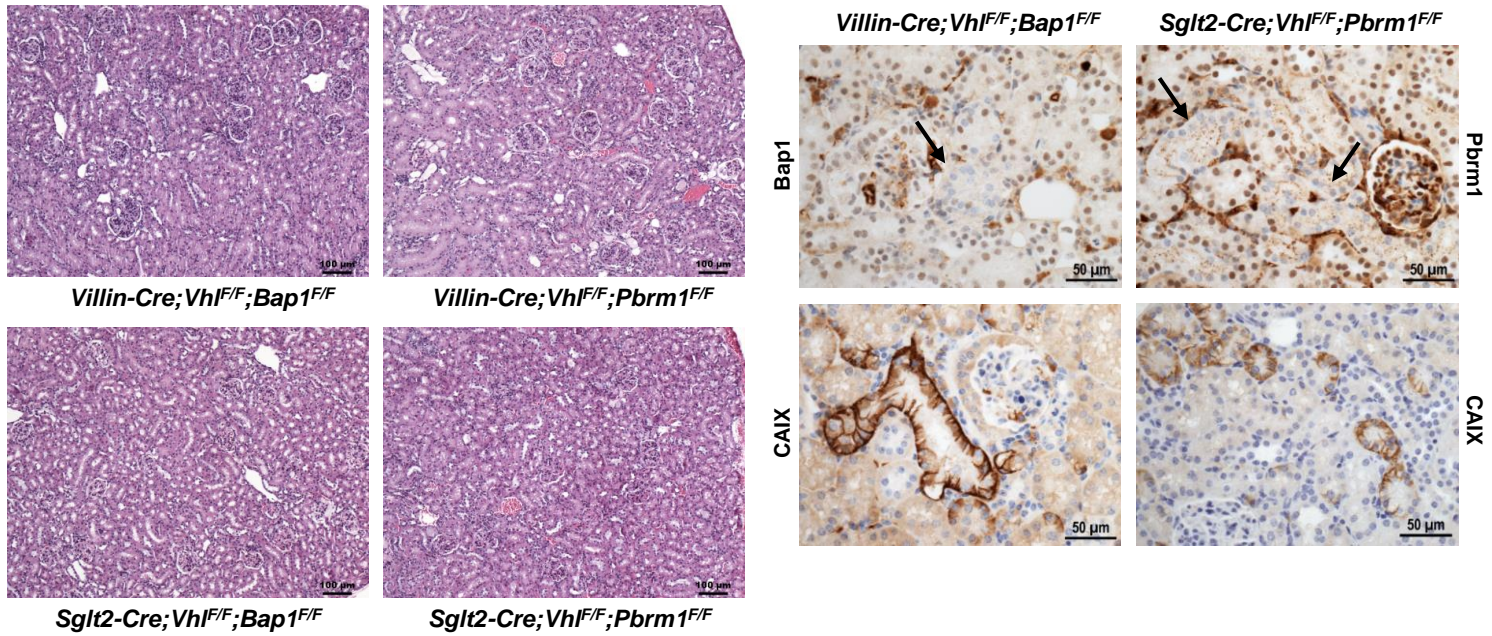

B

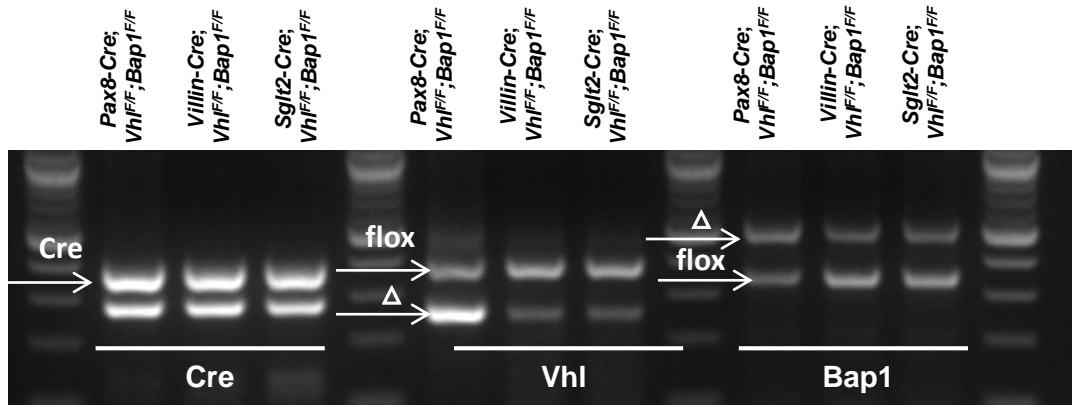

C

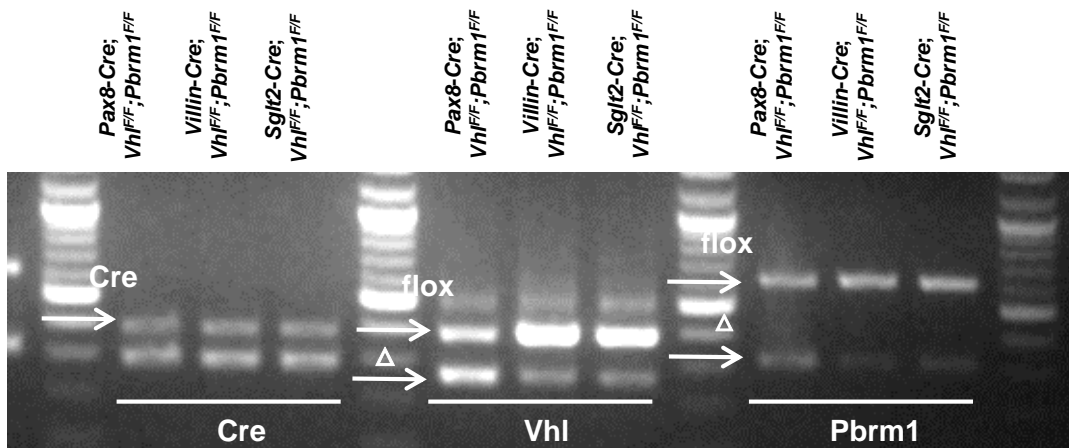

D

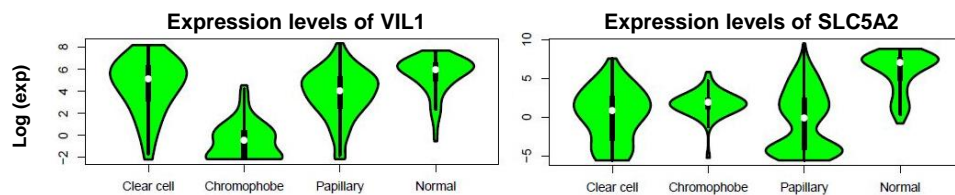

Supplement: NIHMS874898-supplement-3.pdf [file NIHMS874898-supplement-3.pdf]
