# Supplementary material
Source: PubMed Central journal article supplement (PMC5540776)

Gu, Supplementary Figure S1. Validation of *Pax8-Cre;Vhl;Bap1* mice.

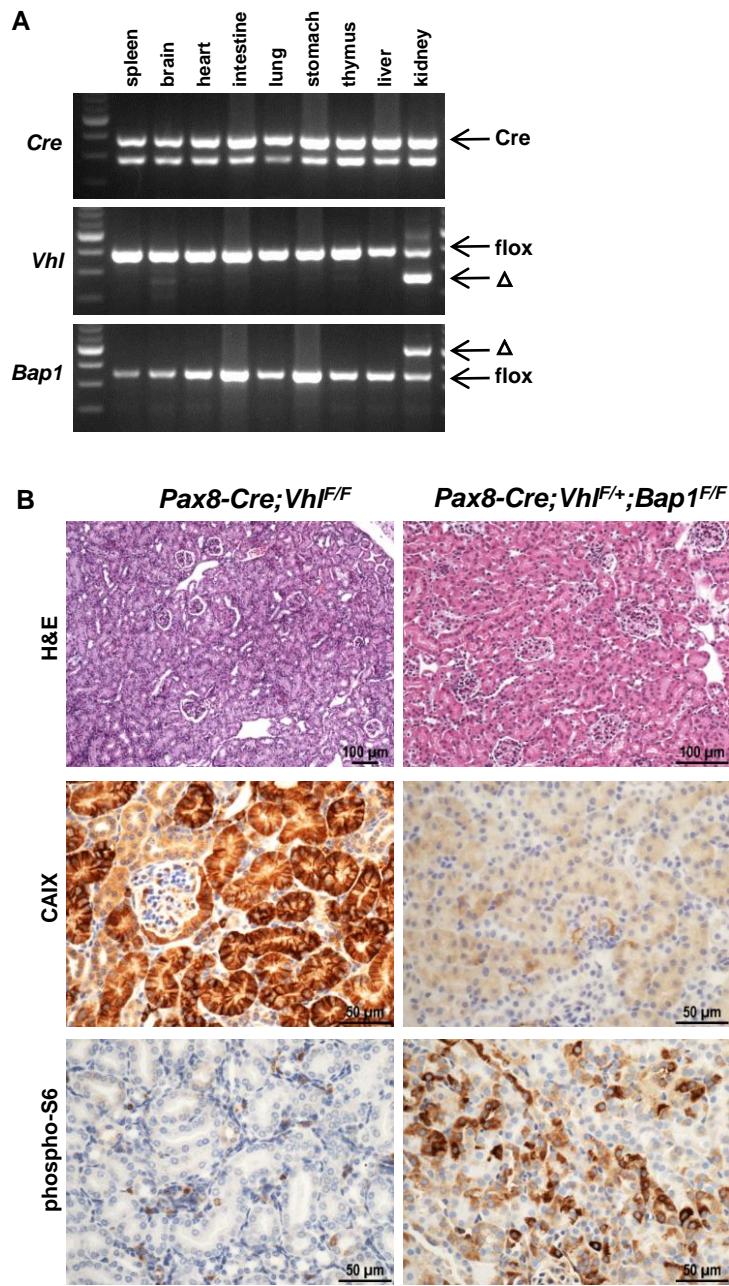

Supplement: NIHMS874898-supplement-1.pdf [file NIHMS874898-supplement-1.pdf]

Gu, Supplementary Figure S2. Validation of *Pax8-Cre;Vhl;Pbrm1* mice.

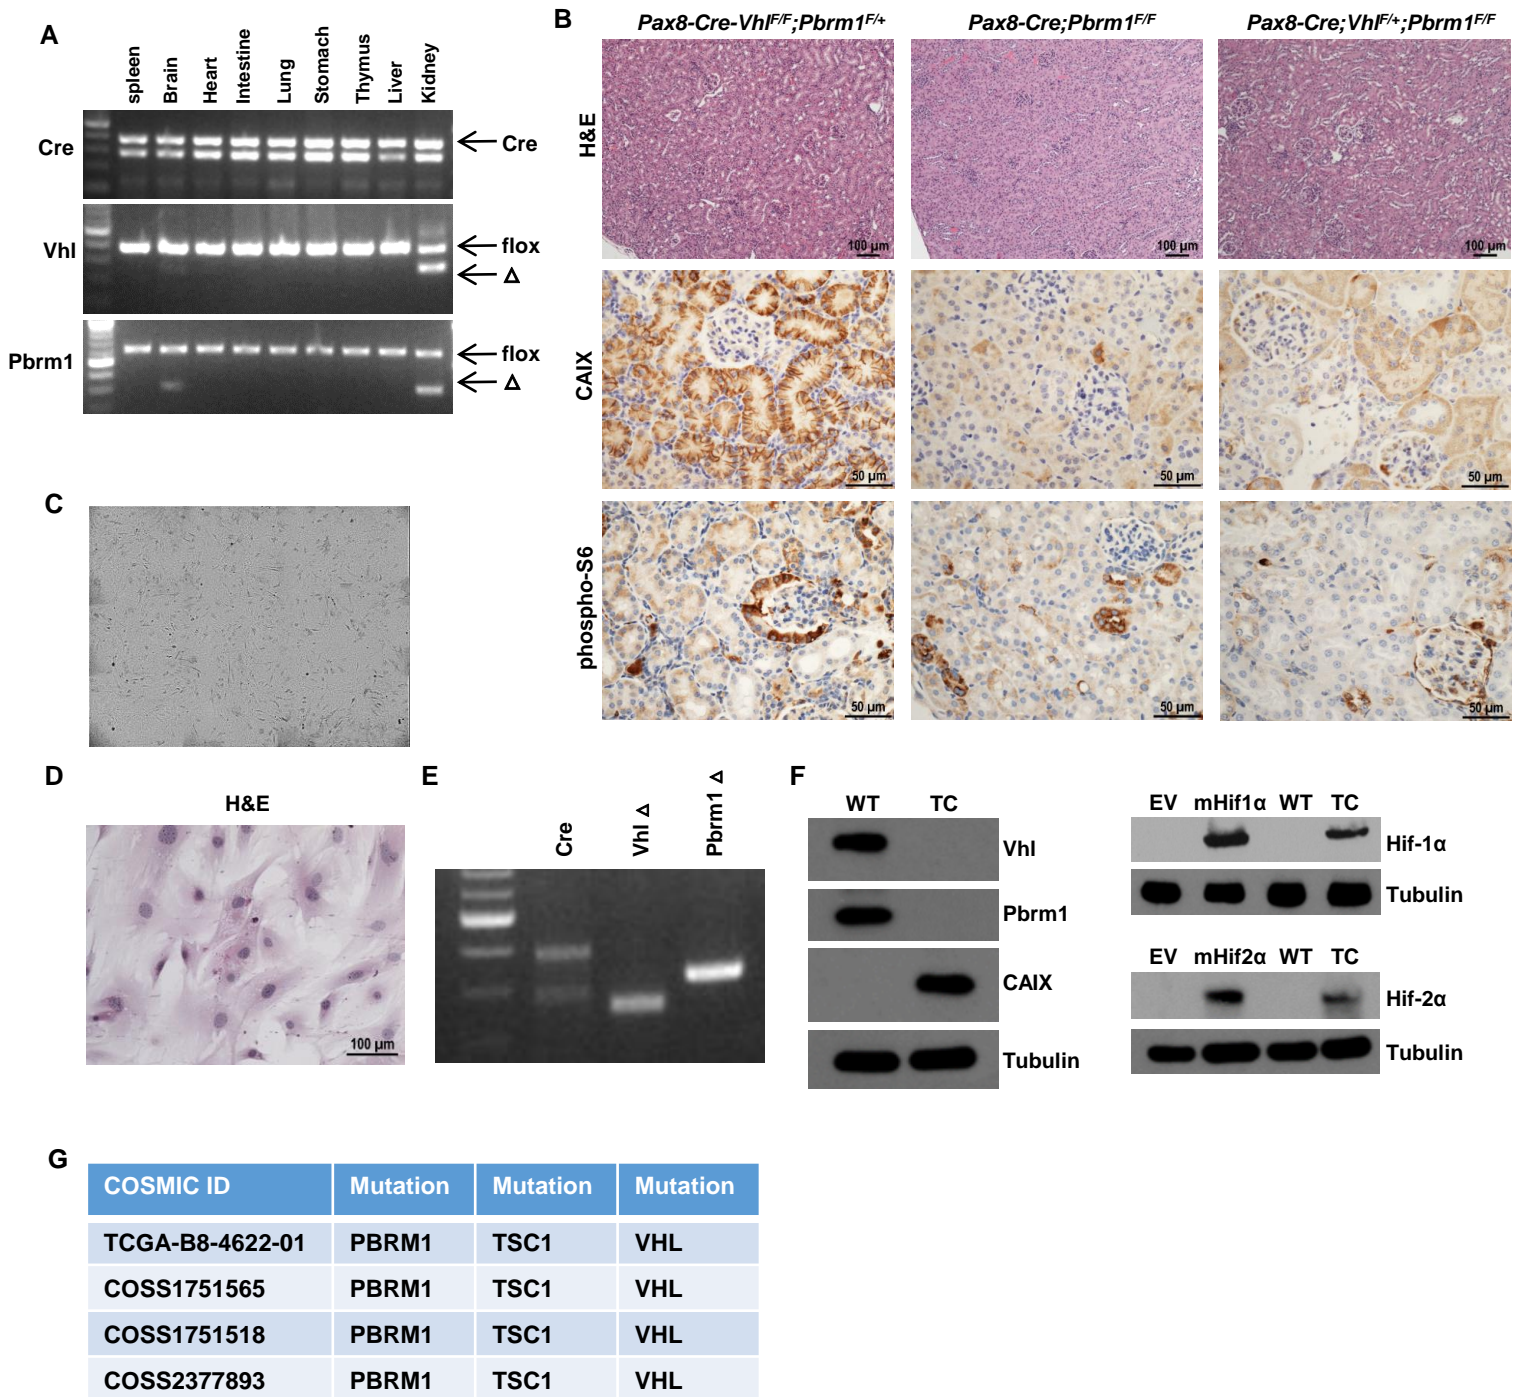

Supplement: NIHMS874898-supplement-2.pdf [file NIHMS874898-supplement-2.pdf]
